# Supplementary material for: MCP-1 contributes to macrophage infiltration into adipose tissue, insulin resistance, and hepatic steatosis in obesity
Source: JCI journal article supplement (doi:10.1172/jci26498), 2006-05-12
Supplement: sd1 [file 1]

Supplementary Figure 1

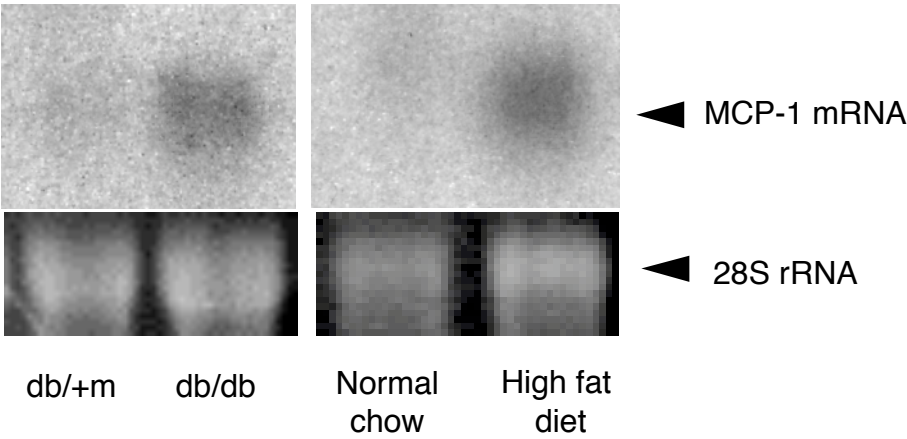

Supplementary Figure 2

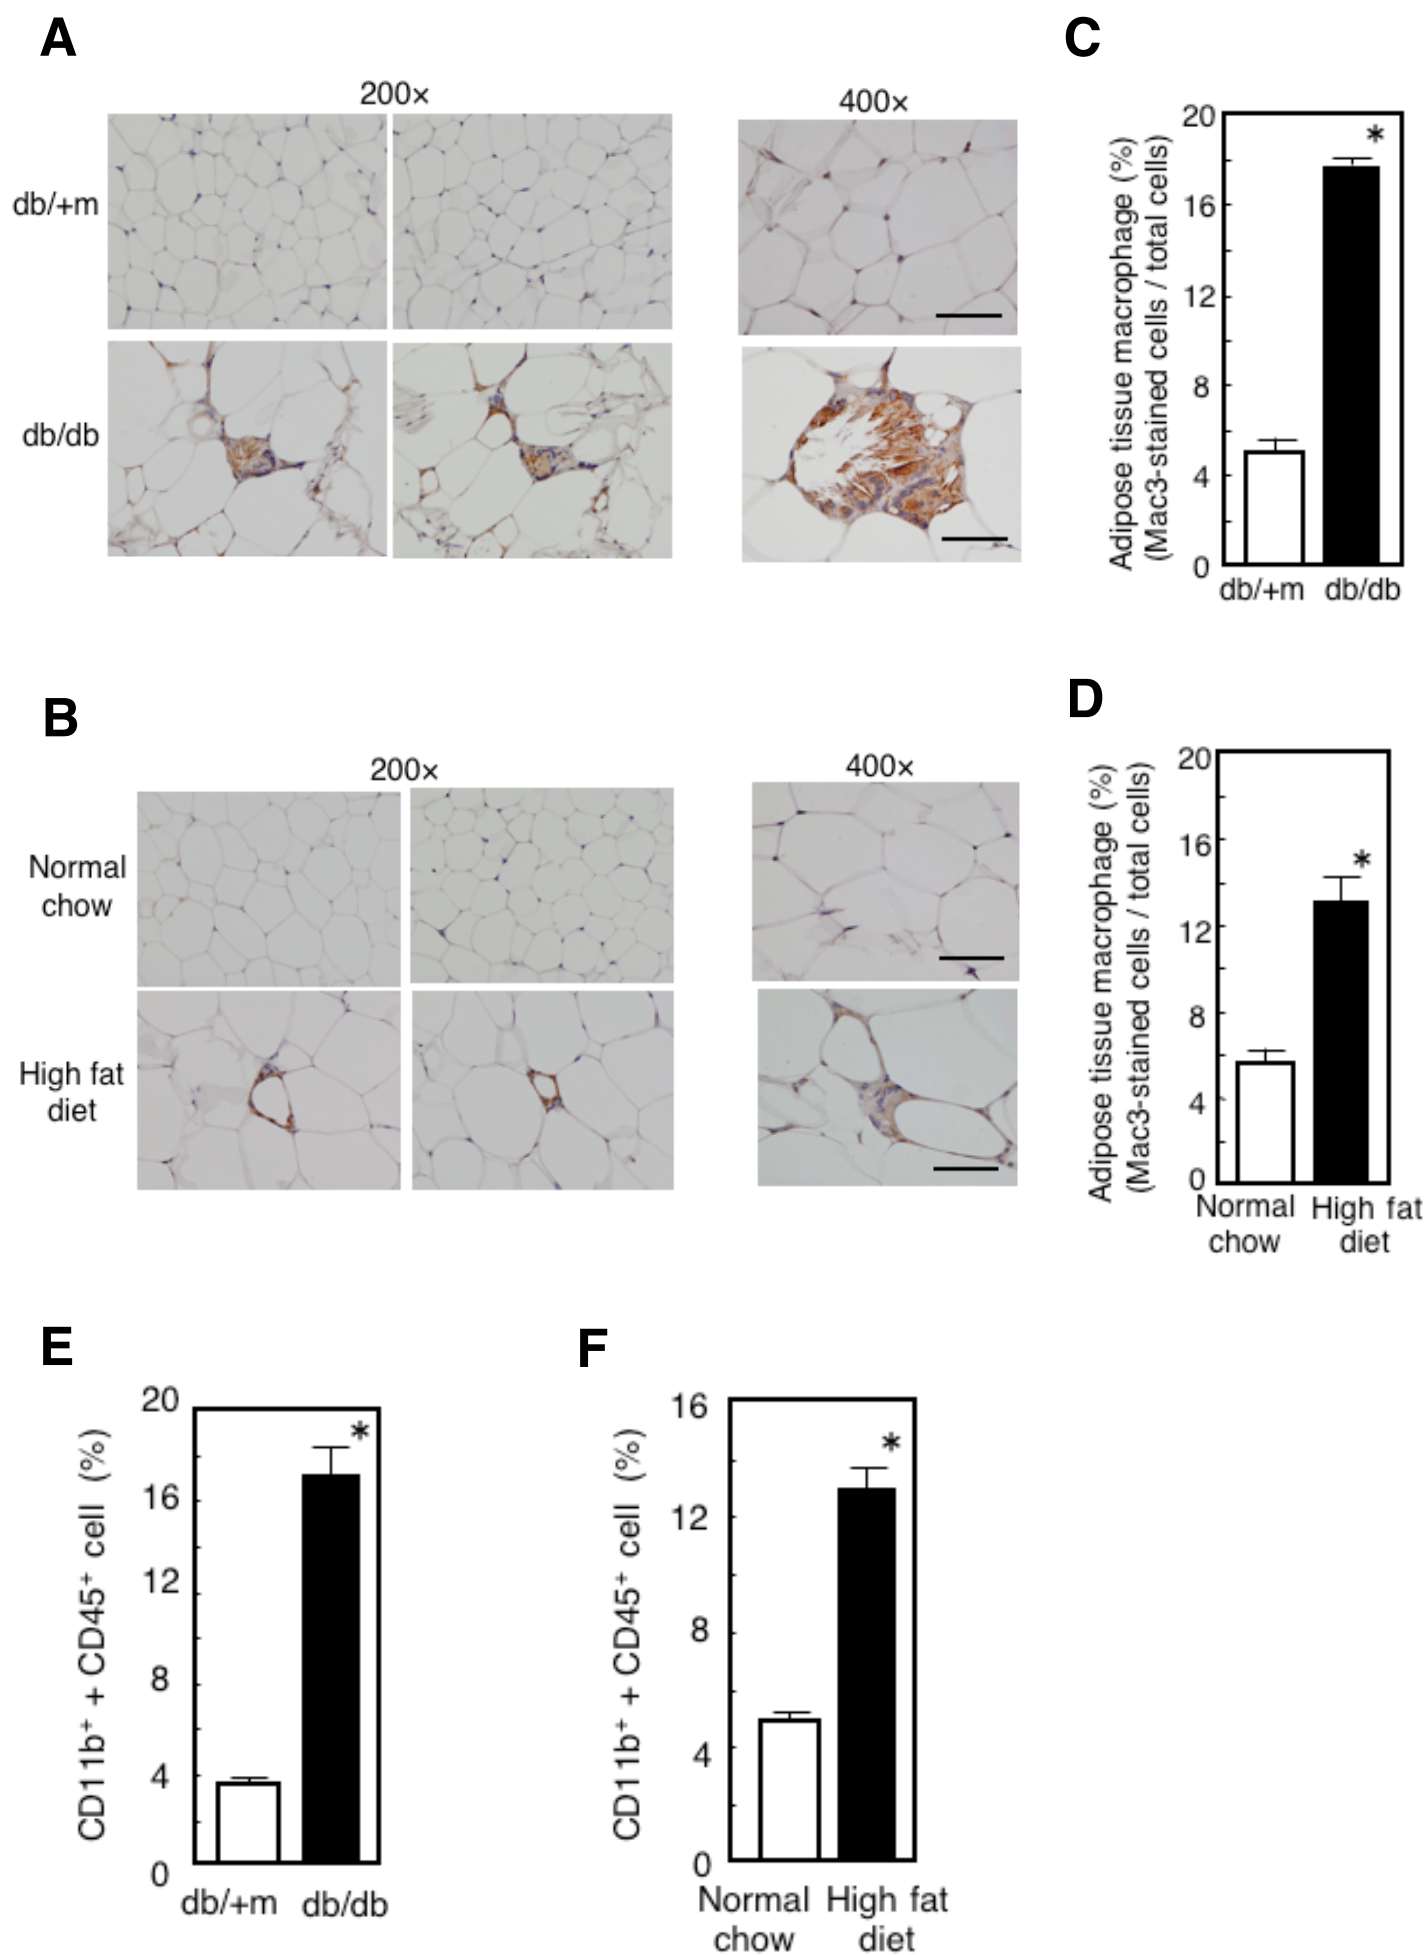

**Supplemental Figure 1.** Direct comparison of MCP-1 mRNA expression in white adipose tissue on the same sheet in Northern blot analysis. Total RNA was extracted from white adipose tissue (epididymal fat pad) of 8-week-old db/db mice or lean control (db/+m) mice and of 18-week-old C57BL/6J mice fed either a high fat diet or normal chow for 12 weeks was subjected to Northern blot analysis on the same sheet with a probe specific for mouse MCP-1 mRNA. The region of the ethidium bromide-stained gel containing 28S rRNA is also shown.

**Supplemental Figure 2.** Macrophage infiltration in white adipose tissue of obese mice. (A, B) Epididymal white adipose tissue of 11-week-old db/db and control db/+m mice (A) or of 10-week-old C57BL/6J mice fed a high fat diet or normal chow for 5 weeks (B) was subjected to immunohistochemical analysis with a mAb to Mac3. Three different fields (two 200× fields and one 400× field) are shown. Macrophages are stained brown. Scale bars, 50 μm. (C, D) Macrophage infiltration into epididymal fat tissue was quantitated in db/db mice ( $n = 8$ ) and control db/+m mice ( $n = 9$ ) (C) or in mice fed a high fat diet ( $n = 7$ ) or control normal chow ( $n = 7$ ) (D) by calculating the ratio of the number of Mac3-positive cells to the number of total cells. Data are means  $\pm$  SE.  $*P < 0.001$  versus the corresponding value for control mice. (E, F) The SVF of epididymal fat tissue was subjected to flow cytometry for quantitation of the proportion of cells positive for both CD11b and CD45 (macrophages). Data are expressed as a percentage of cells positive for CD11b and CD45 and are means  $\pm$  SE ( $n = 4$ ).  $*P < 0.05$  versus the corresponding value for control mice
